# Supplementary material for: Identification of the Catechin Uptake Transporter Responsible for Intestinal Absorption of Epigallocatechin Gallate in Mice
Source: PubMed Central journal article supplement (PMC6662683; doi:10.1038/s41598-019-47214-4), 2019-07-29
Supplement: 41598_2019_47214_MOESM1_ESM.pdf [file 41598_2019_47214_MOESM1_ESM.pdf]

Title: Identification of the Catechin Uptake Transporter Responsible for Intestinal Absorption of Epigallocatechin Gallate in Mice.

Authors: Shunsuke Ishii, Hidefumi Kitazawa, Takuya Mori, Noriko Osaki, Aya Kirino, Shun Nakamura, Akira Shimotoyodome, and Ikumi Tamai

Journal: Scientific Reports.

**Supplemental Table 1.** Restriction sites used for cloning ORFs of EGCg transporter candidate genes into the pSP64 poly(A) vector or modified vectors and linearization.

|    | Protein name | Gene symbol     | Cloning site |        | Linearization site  |
|----|--------------|-----------------|--------------|--------|---------------------|
|    |              |                 | 5'-end       | 3'-end |                     |
| 5  | ZIP14        | <i>Slc39a14</i> | Hind III     | Xba I  | <sup>a</sup> Mlu I  |
|    | ASBT         | <i>Slc10a2</i>  | Pst I        | Sac I  | EcoR I              |
|    | CTL4         | <i>Slc44a4</i>  | Hind III     | Xba I  | Pvu II              |
|    | DRA          | <i>Slc26a3</i>  | BamH II      | Sac I  | EcoR I              |
|    | DTDST        | <i>Slc26a2</i>  | Pst I        | Xba I  | <sup>b</sup> Bgl II |
| 10 | LAT2         | <i>Slc7a8</i>   | Hind III     | Xba I  | <sup>b</sup> Bgl II |
|    | NBC1         | <i>Slc4a4</i>   | Sal I        | Xba I  | EcoR I              |
|    | MNK          | <i>Atp7a</i>    | Pst I        | Xba I  | <sup>b</sup> Bgl II |
|    | KCC3         | <i>Slc12a6</i>  | Sal I        | Xba I  | <sup>a</sup> Mlu I  |
|    | MCT1         | <i>Slc16a1</i>  | Pst I        | Xba I  | EcoR I              |

15 <sup>a</sup>Mlu I and <sup>b</sup>Bgl II sites were inserted into the EcoR I (86) site of the pSP64 poly (A) vector.

Title: Identification of the Catechin Uptake Transporter Responsible for Intestinal Absorption of Epigallocatechin Gallate in Mice.

Authors: Shunsuke Ishii, Hidefumi Kitazawa, Takuya Mori, Noriko Osaki, Aya Kirino, Shun Nakamura, Akira Shimotoyodome, and Ikumi Tamai

Journal: Scientific Reports.

**Supplemental Table 2.** Fold change of intestinal expression levels of all plasma membrane transporter proteins identified in shotgun proteomics analysis.

| Protein name | Gene symbol        | UniProtKB ID | <sup>a</sup> Fold Change |       |      |
|--------------|--------------------|--------------|--------------------------|-------|------|
|              |                    |              | Jejunum                  | Ileum |      |
| 20           | MRP7               | Abcc10       | MRP7_MOUSE               | 0.6   | 15.2 |
|              | ZIP14              | Slc39a14     | S39AE_MOUSE              | 1.1   | 13.4 |
|              | ASBT               | Slc10a2      | NTCP2_MOUSE              | 0.8   | 7.1  |
|              | CTLA4              | Slc44a4      | CTLA4_MOUSE              | 0.5   | 4.9  |
| 25           | MDR1A              | Abeb1a       | MDR1A_MOUSE              | 1.8   | 3.7  |
|              | y+LAT1             | Slc7a7       | YLAT1_MOUSE              | 1.9   | 3.6  |
|              | NaDC1              | Slc13a2      | S13A2_MOUSE              | 3.3   | 3.1  |
|              | DRA                | Slc26a3      | S26A3_MOUSE              | 1.4   | 3.0  |
|              | DTDST              | Slc26a2      | S26A2_MOUSE              | 1.3   | 3.0  |
| 30           | LAT2               | Slc7a8       | LAT2_MOUSE               | 1.2   | 2.8  |
|              | NBC1               | Slc4a4       | S4A4_MOUSE               | 1.5   | 2.8  |
|              | OSTb               | Slc51b       | OSTB_MOUSE               | 1.7   | 2.8  |
|              | SVCT2              | Slc23a2      | S23A2_MOUSE              | 2.9   | 2.6  |
|              | ARF6               | Arf6         | ARF6_MOUSE               | 1.5   | 2.6  |
| 35           | NHERF4             | Pdzd3        | NHRF4_MOUSE              | 2.4   | 2.4  |
|              | MRP2               | Abcc2        | MRP2_MOUSE               | 1.8   | 2.2  |
|              | BCRP1              | Abcg2        | ABCG2_MOUSE              | 1.1   | 2.2  |
|              | ZnT1               | Slc30a1      | ZNT1_MOUSE               | 2.4   | 2.2  |
|              | NHERF3             | Pdzk1        | NHRF3_MOUSE              | 2.2   | 2.2  |
| 40           | MNK                | Atp7a        | ATP7A_MOUSE              | 1.5   | 2.1  |
|              | LAT4               | Slc43a2      | LAT4_MOUSE               | 1.9   | 2.1  |
|              | KCC4               | Slc12a7      | S12A7_MOUSE              | 1.6   | 2.1  |
|              | 4F2hc              | Slc3a2       | 4F2_MOUSE                | 2.1   | 2.1  |
|              | KCC3               | Slc12a6      | S12A6_MOUSE              | 1.4   | 2.0  |
| 45           | MCT1               | Slc16a1      | MOT1_MOUSE               | 1.1   | 2.0  |
|              | PEPT1              | Slc15a1      | S15A1_MOUSE              | 1.5   | 2.0  |
|              | MUSEC1             | Stxbp2       | STXB2_MOUSE              | 2.2   | 2.0  |
|              | KST1               | Slc5a11      | SC5AB_MOUSE              | 2.1   | 2.0  |
|              | Sterolin-2         | Abcg8        | ABCG8_MOUSE              | 2.2   | 1.9  |
| 50           | TAUT               | Slc6a6       | SC6A6_MOUSE              | 0.3   | 1.9  |
|              | ATP8B1             | Atp8b1       | AT8B1_MOUSE              | 1.6   | 1.9  |
|              | NBC3               | Slc4a7       | S4A7_MOUSE               | 2.1   | 1.9  |
|              | Syntaxin-4         | Stx4         | STX4_MOUSE               | 1.4   | 1.9  |
|              | TM9SF1             | Tm9sf1       | TM9S1_MOUSE              | 1.5   | 1.8  |
| 55           | ATP1B1             | Atp1b1       | AT1B1_MOUSE              | 1.4   | 1.8  |
|              | Syntaxin-7         | Stx7         | STX7_MOUSE               | 1.7   | 1.8  |
|              | ATPB3              | Atp1b3       | AT1B3_MOUSE              | 1.1   | 1.7  |
|              | ZnT5               | Slc30a5      | ZNT5_MOUSE               | 2.1   | 1.7  |
|              | NKCC1              | Slc12a2      | S12A2_MOUSE              | 1.1   | 1.7  |
| 60           | OSTa               | Slc51a       | OSTA_MOUSE               | 1.3   | 1.6  |
|              | PMCA2              | Atp2b2       | AT2B2_MOUSE              | 1.8   | 1.6  |
|              | Cadherin-17        | Cdh17        | CAD17_MOUSE              | 1.8   | 1.6  |
|              | TM9SF2             | Tm9sf2       | TM9S2_MOUSE              | 1.5   | 1.5  |
|              | Pantophysin        | Sypl1        | SYPL1_MOUSE              | 1.8   | 1.5  |
| 65           | GLUT1              | Slc2a1       | GTR1_MOUSE               | 1.3   | 1.5  |
|              | VAT1               | Vat1         | VAT1_MOUSE               | 2.0   | 1.5  |
|              | VTHIRP1            | Vti1b        | VTH1B_MOUSE              | 4.2   | 1.5  |
|              | Basigin            | Bsg          | BASI_MOUSE               | 1.5   | 1.4  |
|              | TFR1               | Tfrc         | TFR1_MOUSE               | 1.3   | 1.4  |
| 70           | ASCT2              | Slc1a5       | AAAT_MOUSE               | 0.4   | 1.3  |
|              | Hephaestin         | Heph         | HEPH_MOUSE               | 1.6   | 1.3  |
|              | Syndet             | Snap23       | SNP23_MOUSE              | 1.4   | 1.3  |
|              | ALDP               | Abcd1        | ABCD1_MOUSE              | 1.5   | 1.2  |
|              | LDLR               | Ldlr         | LDLR_MOUSE               | 1.3   | 1.2  |
| 75           | ZIP7               | Slc39a7      | S39A7_MOUSE              | 1.5   | 1.2  |
|              | MRP3               | Abcc3        | MRP3_MOUSE               | 1.2   | 1.2  |
|              | Syntaxin-3         | Stx3         | STX3_MOUSE               | 1.2   | 1.1  |
|              | MUNC18c            | Stxbp3       | STXB3_MOUSE              | 1.5   | 1.1  |
|              | NaPi2b             | Slc34a2      | NPT2B_MOUSE              | 0.3   | 1.1  |
| 80           | GLUT2              | Slc2a2       | GTR2_MOUSE               | 1.5   | 1.1  |
|              | SMCT               | Slc5a8       | SC5A8_MOUSE              | 16.7  | 1.1  |
|              | CTLI               | Slc44a1      | CTLI_MOUSE               | 1.3   | 1.0  |
|              | V-ATPase subunit A | Atp6v1a      | VATA_MOUSE               | 1.6   | 1.0  |
|              | ATP1A1             | Atp1a1       | AT1A1_MOUSE              | 1.4   | 1.0  |
| 85           | SEC61G             | Sec61g       | SC61G_MOUSE              | 1.6   | 0.9  |
|              | AP3b1              | Ap3b1        | AP3B1_MOUSE              | 1.3   | 0.9  |
|              | ORCTL2             | Slc22a18     | S22A1_MOUSE              | 1.2   | 0.8  |
|              | SGLT4              | Slc5a9       | SC5A9_MOUSE              | 2.2   | 0.8  |
|              | Sterolin-1         | Abcg5        | ABCG5_MOUSE              | 1.8   | 0.8  |
| 90           | B0AT1              | Slc6a19      | S6A19_MOUSE              | 1.1   | 0.8  |

Title: Identification of the Catechin Uptake Transporter Responsible for Intestinal Absorption of Epigallocatechin Gallate in Mice.

Authors: Shunsuke Ishii, Hidefumi Kitazawa, Takuya Mori, Noriko Osaki, Aya Kirino, Shun Nakamura, Akira Shimotoyodome, and Ikumi Tamai

Journal: Scientific Reports.

|     |             |         |             |     |     |
|-----|-------------|---------|-------------|-----|-----|
|     | CNT2        | Slc28a2 | S28A2_MOUSE | 1.1 | 0.7 |
|     | EDB         | Vamp8   | VAMP8_MOUSE | 1.4 | 0.7 |
|     | ANK         | Ankh    | ANKH_MOUSE  | 2.4 | 0.6 |
|     | CAT1        | Slc7a1  | CTR1_MOUSE  | 1.2 | 0.6 |
| 95  | PIgR        | Pigr    | PIGR_MOUSE  | 0.8 | 0.5 |
|     | PCFT/HCP1   | Slc46a1 | PCFT_MOUSE  | 1.8 | 0.5 |
|     | GLUT5       | Slc2a5  | GTR5_MOUSE  | 0.7 | 0.4 |
|     | CIP1        | Slc12a9 | S12A9_MOUSE | 2.1 | 0.4 |
|     | SGLT1       | Slc5a1  | SC5A1_MOUSE | 1.8 | 0.3 |
| 100 | Syntaxin-17 | Stx17   | STX17_MOUSE | 6.3 | 0.2 |

---

<sup>a</sup>Fold Change of the average expression levels in the catechin group to the control group (n = 3/group).

Title: Identification of the Catechin Uptake Transporter Responsible for Intestinal Absorption of Epigallocatechin Gallate in Mice.

Authors: Shunsuke Ishii, Hidefumi Kitazawa, Takuya Mori, Noriko Osaki, Aya Kirino, Shun Nakamura, Akira Shimotoyodome, and Ikumi Tamai

Journal: Scientific Reports.

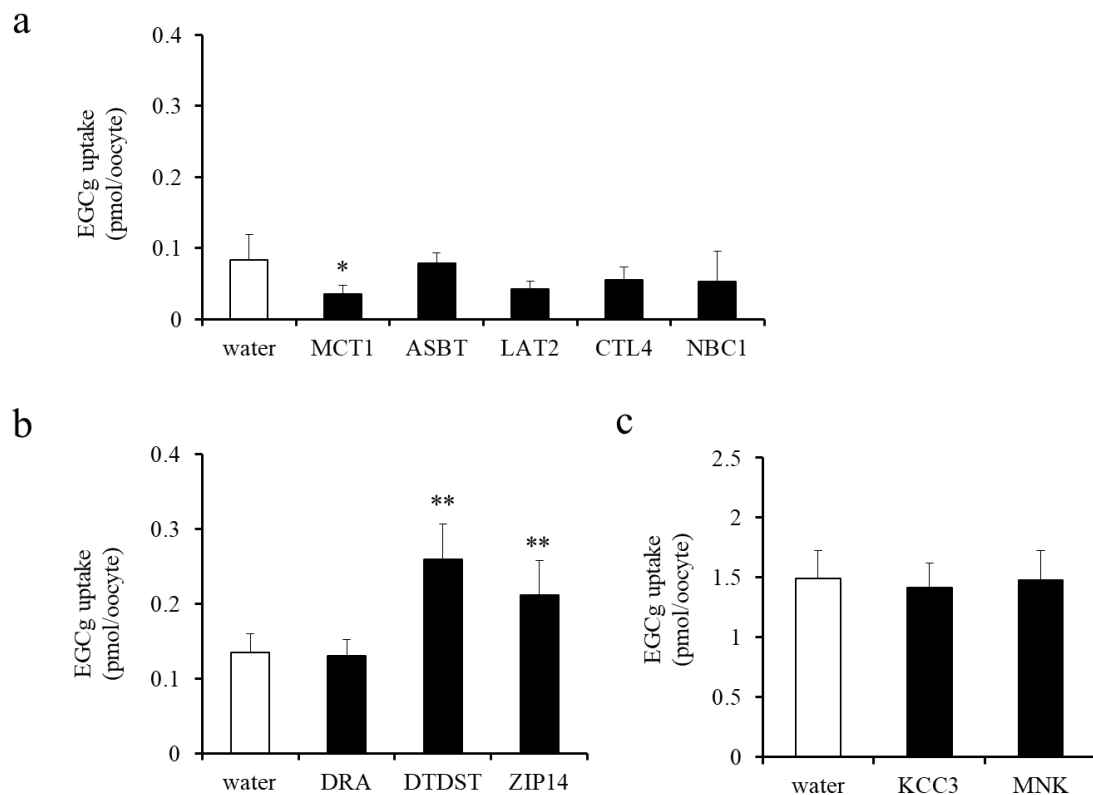

105

Supplemental Figure 1. (a) Epigallocatechin gallate (EGCg) uptake by *Xenopus laevis* oocytes microinjected with cRNA of monocarboxylate transporter 1 (MCT1), apical sodium-dependent bile acid transporter (ASBT), L-amino acid transporter 2 (LAT2), choline transporter-like protein 4 (CTL4), sodium bicarbonate cotransporter 1 (NBC1), or water (n = 4–5/group) incubated with 100 mM EGCg for 2 hours. Data are presented as mean ± SD. Significant differences as determined by means of Student's t-test are indicated by \* (P < 0.05) and \*\* (P < 0.01). (b) EGCg uptake by *Xenopus laevis* oocytes microinjected with cRNA of down-regulated in adenoma (DRA), diastrophic dysplasia sulfate transporter (DTDST), zinc transporter 14 (ZIP14), or water (n = 6–8/group) incubated with 100 mM EGCg for 2 hours. Data are presented as mean ± SD. Significant differences as determined by means of Student's t-test are indicated by \* (P < 0.05) and \*\* (P < 0.01). (c) EGCg uptake by *Xenopus laevis* oocytes microinjected with cRNA of potassium chloride cotransporter 3 (KCC3), Menkes P-type ATPase (MNK), or water (n = 6–8/group) incubated with 500 mM EGCg for 2 hours. Data are presented as mean ± SD. Significant differences as determined by means of Student's t-test are indicated by \* (P < 0.05) and \*\* (P < 0.01).

120

Title: Identification of the Catechin Uptake Transporter Responsible for Intestinal Absorption of Epigallocatechin Gallate in Mice.  
Authors: Shunsuke Ishii, Hidefumi Kitazawa, Takuya Mori, Noriko Osaki, Aya Kirino, Shun Nakamura, Akira Shimotoyodome, and Ikumi Tamai  
Journal: Scientific Reports.

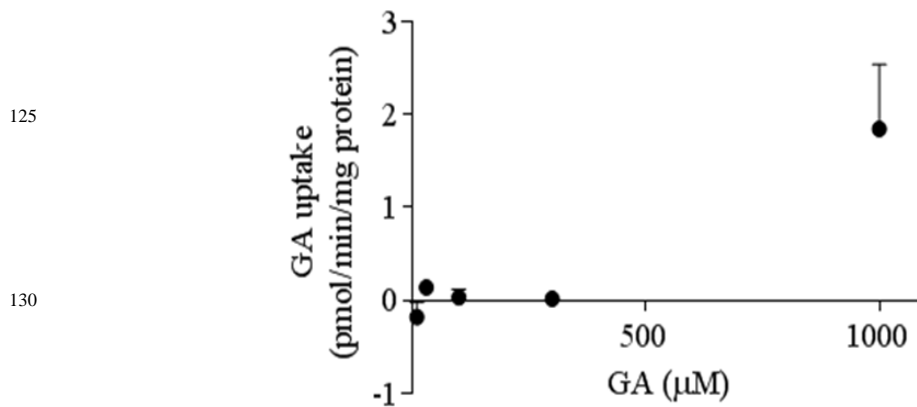

135 Supplemental Figure 2. Kinetics of gallic acid uptake mediated by DTDST after subtracting the values obtained with mock cells ( $n = 4$ ). CHO-K1 cells stably expressing DTDST or mock cells were incubated with gallic acid at concentrations ranging from 1 to 1000  $\mu\text{M}$  for 30 min. Data are presented as mean  $\pm$  SD.
